# Supplementary material
Source: PubMed Central journal article supplement (PMC2741281)
Supplement: 0903752106_0903752106SI.pdf [file 0903752106_0903752106SI.pdf]

# Supporting Information

Yaragatupalli et al. 10.1073/pnas.0903752106

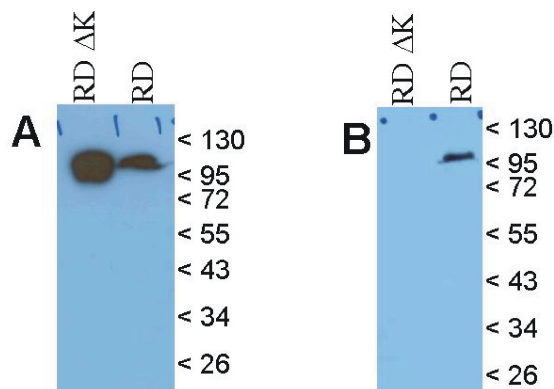

**Fig. S1.** Western blot analysis of Xenopus oocytes isolated plasma membrane proteins. (A) Immunodetection of both RD (right lane) and RD $\Delta$ KESYY (left lane, indicated RD $\Delta$ K) by an  $\alpha$ 1 antibody. (B) Immunodetection with an antibody against the C terminus (anti-KETYY; gift from Jim Kyte, University of California, San Diego) which recognizes the Xenopus  $\alpha$ 1 C-terminal sequence KESYY (right lane) and confirms the successful truncation of the mutant (left lane). Enriched plasma membrane fractions were obtained from  $\approx$ 40–50 oocytes according to the method of Hill et al. (1). Twenty-five mg of plasma membrane protein were separated via 10% SDS PAGE (2) and then electrotransferred to PVDF membrane in buffer containing 10 mM CAPS (pH = 11.0), 10% methanol, at constant current (180 mA) for 2 h (3). After blocking with 10% dry milk in PBS, the membrane was probed with anti-NKA antibody MA1–16731 (Affinity Bioreagents) (1:2,500), followed by incubation with HRP-conjugated goat anti-mouse 2<sup>o</sup> antibody. Bands were detected via supersignal substrate kit (Pierce, Rockford, IL) according to the manufacturer's protocol.

1. Hill WG, et al. (2005) Isolation and characterization of the Xenopus oocyte plasma membrane: A new method for studying activity of water and solute transporters. *Am J Physiol Renal Physiol* 289:F217–F224.
2. Laemmli UK (1970) Cleavage of structural proteins during the assembly of the head of bacteriophage T4. *Nature* 227:680–685.
3. Matsudaira P (1987) Sequence from picomole quantities of proteins electroblotted onto polyvinylidene difluoride membranes. *J Biol Chem* 262:10035–10038, 1987.

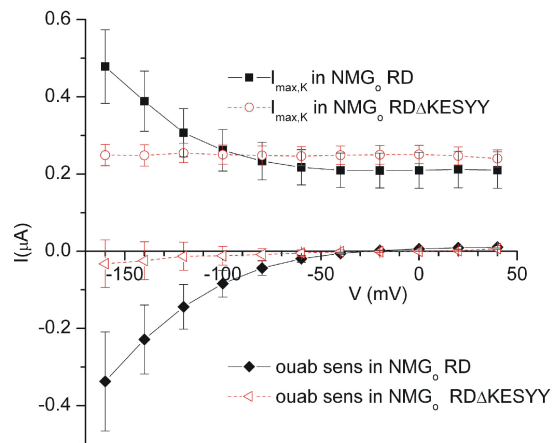

**Fig. S2.** Voltage dependence of Na/K pump related currents in NMG<sub>o</sub><sup>+</sup>. Maximal K<sub>o</sub><sup>+</sup>-induced current ( $I_{max}$ ) from Hill fits (at zero Na<sub>o</sub><sup>+</sup>) are shown for RD (filled black squares,  $n = 15$ ) and for RD $\Delta$ KESYY (open red circles,  $n = 17$ ) pumps. Ouabain-sensitive currents (at zero K<sub>o</sub><sup>+</sup>) are plotted as a function of voltage for the RD pumps (filled black diamonds,  $n = 9$ ) and for the RD $\Delta$ KESYY (open red triangles,  $n = 10$ ). Note the presence of an inward current in RD pumps that disappears in RD $\Delta$ KESYY pumps.

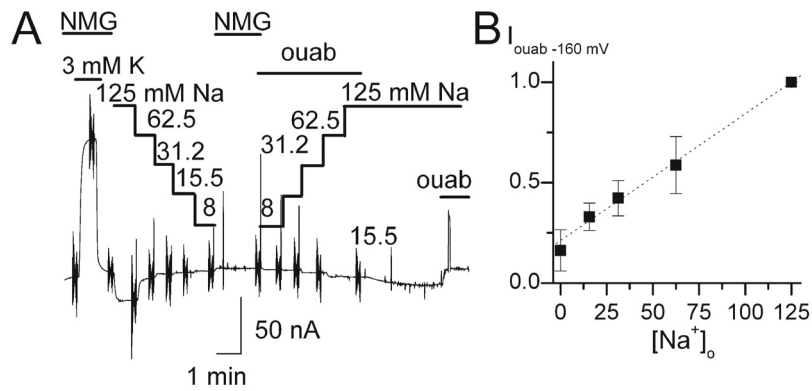

**Fig. S3.**  $[\text{Na}^+]_o$ -dependence of inward steady state Na/K pump current at zero  $\text{K}^+_o$ . (A) Continuous TEVC recording illustrating the maneuvers performed to measure the  $[\text{Na}^+]_o$  dependence of the inward leak through the Na/K pump at  $V_h = -50$  mV. Sharp vertical deflections represent pulses from  $-200$  mV to  $+40$  mV applied to measure the current's voltage dependence. (B)  $[\text{Na}^+]_o$ -dependence of the ouabain-sensitive steady state current measured at  $-160$  mV normalized to the current observed in  $125$  mM  $\text{Na}^+_o$ . The line represents a linear fit to the average data from 5 oocytes.

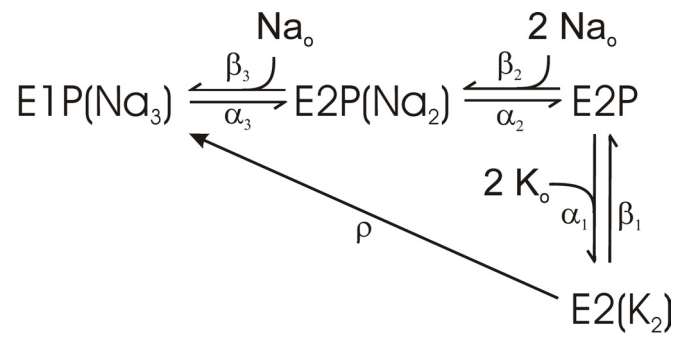

**Fig. S4.** Simplified kinetic scheme of Na/K pump function. Greek letters  $\alpha$  and  $\beta$  indicate reaction rates in the forward and reverse directions, respectively, for each step in the scheme. For additional details, see [SI Appendix](#).

## Other Supporting Information Files

[SI Appendix \(PDF\)](#)
