# Supplementary material
Source: PubMed Central journal article supplement (PMC2741281)
Supplement: 0903752106_Appendix_PDF.pdf [file 0903752106_Appendix_PDF.pdf]

## SI Appendix

**Simplified Kinetic Scheme of Na/K Pump Function.** ATP-dependent  $K_1^+$  deocclusion,  $Na_1^+$  binding, and phosphorylation were lumped together in a single reaction rate,  $\rho$  (with the plausible assumption that the reverse reactions will not occur under our experimental conditions) similarly to Sagar and Rakowski (1). The differential equations describing the model are:

$$\frac{dE1P(Na_3)}{dt} = \rho \cdot E2(K_2) + \beta_3 \cdot E2P(Na_2) - \alpha_3 \cdot E1P(Na_3)$$

$$\frac{dE2P(Na_2)}{dt} = \alpha_3 \cdot E1P(Na_3) + \beta_2 \cdot E2P - \beta_3 \cdot E2P(Na_2) - \alpha_2 \cdot E2P(Na_2)$$

$$\frac{dE2P}{dt} = \alpha_2 \cdot E2P(Na_2) + \beta_1 \cdot E2(K_2) - \beta_2 \cdot E2P - \alpha_1 E2P$$

$$\frac{dE2(K_2)}{dt} = \alpha_1 E2P - \rho \cdot E2(K_2) - \beta_1 \cdot E2(K_2)$$

and the conservation equation:

$$E1P(Na_3) + E2P(Na_2) + E2P + E2(K_2) = 1$$

where  $E1P(Na_3)$ ,  $E2P$ , etc. depict the fractional occupancy of each state. Analogous to Heyse et al. (2) we describe the release of the first  $Na^+$  ion as the most voltage-dependent pseudo first order reaction rate  $\beta_3 = \beta_3^0 \cdot [Na]_o \cdot \exp(-\lambda_3 \cdot \frac{F}{RT} \cdot V)$ , which combines  $Na^+$  binding to its exclusive site,  $Na^+$  re-occlusion, and the reverse conformational transition. F, R and T have their usual meaning, V is the transmembrane voltage and  $\lambda_3$  is the fraction of the electric field traveled by the  $Na^+$  ion to its binding site (0.75; refs. 1, 2). The general model including the voltage-dependent binding of the two other  $Na^+$  ions (in the reverse reaction) or the two  $K^+$  ions (in the forward reaction) will include similar expressions for  $\beta_2$  and  $\alpha_1$ , but with smaller  $\lambda$  (0.1-0.4). For simplicity, to illustrate the effect of modifying  $Na^+$  binding to the shared sites and to obtain an explicit expression for the centers ( $V_{1/2}$ ) of the  $I_p$ -V curve and the Q-V curve as a function of the other rates, we consider the case in which ion binding to the shared sites is not voltage-dependent (i.e.  $\beta_2 = \beta_2^0 [Na]_o$  and  $\alpha_1 = \alpha_1^0 [K]_o$ ).

Similar to the description by (4), the steady state pump current ( $I_p$ ) at any given time will be given by  $I_p = \rho \cdot E2(K_2)$ , in which

$$E2(K_2) = \frac{\alpha_1 \alpha_2 \alpha_3}{\alpha_1 \alpha_2 \alpha_3 + \alpha_2 \alpha_3 \rho + \alpha_2 \alpha_3 \beta_1 + \alpha_1 \alpha_2 \rho + \alpha_3 \beta_2 \rho + \beta_2 \beta_3 \rho + \beta_1 \beta_2 \beta_3 + \alpha_3 \beta_1 \beta_2 + \alpha_1 \alpha_3 \rho + \alpha_1 \beta_3 \rho} \quad [1]$$

In the absence of  $K_o^+$   $\alpha_1 = 0$  and the kinetic scheme is reduced to the top line describing the transition between  $E1P(Na_3)$  and  $E2P$ . The steady state distribution of the slow component of charge movement associated with the release of the first  $Na^+$  ion is given by the steady state occupancy of  $E1P(Na_3)$ :

$$E1(Na_3) = \frac{\beta_2\beta_3}{\alpha_2\alpha_3 + \alpha_3\beta_2 + \beta_2\beta_3} \quad [2]$$

In order to find the center of the I<sub>p</sub>-V curve in the presence of K<sub>o</sub><sup>+</sup> (V<sub>1/2IP</sub>) and of the Q-V curve in the absence of K<sub>o</sub><sup>+</sup> (V<sub>1/2Q</sub>) we equated both E2(K<sub>2</sub>) and E1(Na<sub>3</sub>), respectively, to 0.5 and solved for the rate constant for Na<sup>+</sup> binding to its exclusive site, β<sub>3</sub> (and therefore for V<sub>1/2</sub>) as follows:

$$V_{1/2IP} = -0.033 * \ln \left[ \frac{\alpha_1\alpha_2\alpha_3 - \alpha_2\alpha_3\rho - \alpha_2\alpha_3\beta_1 - \alpha_1\alpha_2\rho - \alpha_1\alpha_3\rho - \beta_2(\alpha_3\rho + \alpha_3\beta_1)}{\beta_3^0 [Na]_o \{\beta_2(\rho + \beta_1) + \alpha_1\rho\}} \right] \quad [3]$$

$$V_{1/2Q} = -0.033[\ln\alpha_3 + \ln(\alpha_2 + \beta_2) - \ln(\beta_3^0 [Na]_o) - \ln\beta_2] \quad [4]$$

Let's first note that, from Eqs. 3 and 4, if the ΔKESYY mutation affected Na<sup>+</sup> binding to the exclusive binding site (β<sub>3</sub><sup>0</sup>) a large shift of identical magnitude would occur in both I<sub>p</sub>- and Q-V curves. On the other hand, if β<sub>3</sub><sup>0</sup> is not modified by the mutation and only β<sub>2</sub> is affected, as we propose, β<sub>3</sub><sup>0</sup> cancels out when subtracting V<sub>1/2IP</sub><sup>ΔKESYY</sup> - V<sub>1/2IP</sub><sup>control</sup> and will not contribute to the magnitude of the shifts.

For simplicity we begin discussing the more straight forward effects on the Q-V. Assuming that the only effect of the ΔKESYY deletion is a 16-fold reduction in the rate of Na<sup>+</sup> binding to the shared sites (i.e. a reduction in β<sub>2</sub><sup>0</sup>), we can calculate the shift induced in the Q-V curve from Eq. (4) as the difference:

$$V_{1/2Q}^{\Delta KESYY} - V_{1/2Q}^{\text{control}} = -0.033 * \{\ln[(16\alpha_2 + \beta_2)/16(\alpha_2 + \beta_2)] - \ln(1/16)\}$$

Although we cannot calculate values for α<sub>2</sub> and β<sub>2</sub> in our preparation, according to Heyse *et al.* (ref. 2; values in table V) at a [Na<sub>o</sub><sup>+</sup>] = 125 mM β<sub>2</sub> << α<sub>2</sub>. Thus, in our experiments the ratio of the first logarithmic term is ≈ 1, which gives

$$V_{1/2Q}^{\Delta KESYY} - V_{1/2Q}^{\text{control}} \cong 0.033 * \ln(1/16) = -91 \text{ mV}$$

This value is almost identical to our observed values (-91 mV in TEVC and -94 mV in patch clamp data).

The effect of a reduction in β<sub>2</sub> in the center of the I<sub>p</sub>-V curve is far less obvious and we need to use other estimates for the discussion. We estimate the maximum turnover rate, ρ, at ~15 s<sup>-1</sup> (I<sub>pmax</sub>/Q<sub>max</sub>, see Fig. 2 legend), whereas the rate of transient charge movement at positive potentials yields an estimate of 200 s<sup>-1</sup> for α<sub>3</sub> (we use TEVC data because intracellular conditions are the same as those used for I<sub>p</sub> measurements).

Again, based on Heyse *et al.* (2), α<sub>2</sub> ~ 1\*10<sup>4</sup> s<sup>-1</sup> and β<sub>2</sub><sup>0</sup> ~ 2\*10<sup>3</sup> M<sup>-1</sup>s<sup>-1</sup> and β<sub>1</sub> ~ 10 s<sup>-1</sup>. Thus, for a K<sub>o</sub> affinity of 100 μM, α<sub>1</sub><sup>0</sup> ~ 10<sup>4</sup> M<sup>-1</sup>s<sup>-1</sup>. Using 10 mM K<sub>o</sub><sup>+</sup> for an initial calculation it is clear that any effect on β<sub>2</sub> will be insignificant in the numerator because α<sub>1</sub>α<sub>2</sub>α<sub>3</sub> ~ 10<sup>8</sup>, whereas the rest of the terms combined reach a maximum of ~3\*10<sup>7</sup> and the terms with β<sub>2</sub> are on the order of 10<sup>6</sup> for RD control pumps.

In the denominator the results will depend on the actual values of  $\alpha_1$  and  $\beta_2$  (which depend on  $[\text{Na}^+]$  and  $[\text{K}^+]$ ). However, it is clear that if  $[\text{K}^+]_o$  is high enough (i.e. near-saturating  $\text{K}_o^+$ )  $\alpha_1 \geq \beta_2$ , even in control pumps and thus, no significant shift will be produced. Consequently, this model predicts a lack of effect of mutants that alter binding of extracellular  $\text{Na}^+$  to the shared sites on the  $I_p$ -V curve.

1. Sagar A, Rakowski RF (1994) Access channel model for the voltage dependence of the forward-running  $\text{Na}^+/\text{K}^+$  pump. *J Gen Physiol* 103:869-893.
2. Heyse S, Wuddel I, Apell HJ, Sturmer W (1994) Partial reactions of the  $\text{Na},\text{K}$ -ATPase: Determination of rate constants. *J Gen Physiol* 104:197-240.
